# Supplementary material for: Genomic analyses indicate resilience of a commercially and culturally important marine gastropod snail to climate change
Source: PeerJ journal article supplement (doi:10.7717/peerj.16498), 2023-11-23
Supplement: 1_TM_Filtering_PopGen.pdf [file 1_TM_Filtering_PopGen.pdf]

## SNP Filtering - PopGen

Population genomic analyses indicate the likely resilience of a commercially and culturally important marine gastropod snail to the effects of climate change

September, 2023

Import packages and data

packages

```
# Clear the global environment  
rm(list=ls())  
  
#Load Libraries  
library(dartR)  
library(poppr)  
library(ggplot2)
```

Data

```
#Load genlight file into the environment  
gl<-gl.load("turbo.gl.all.data.Rdata")  
  
# Let's examine the objective  
nLoc(gl)  
nInd(gl)  
nPop(gl)  
  
#Check the order of individuals' names. If individuals are not ordered by  
name, go to the next step  
indNames(gl)  
  
#Sort all individuals in pop's alphabetical order  
gl <- gl[order(pop(gl)) , ]  
  
indNames(gl)  
popNames(gl)  
  
#Details  
gl
```

Check genotypes are unique (Ref.: Peter Unmack)

```
#NJ Tree - No filtered  
NJ1 <- dist(tab(gl))  
tre1 <- nj(NJ1)
```

```
write.nexus(tre1, file = "Phylogram_gl_TM_r2.nex")
plot(tre1)
```

Remove clones

```
gla <- gl.drop.ind(gl, ind.list=c("NAM07", "SSI16"))
```

*#Details*

gla

Summary plots for minor allele frequencies (maf) This script provides summary histograms of MAF for each population in the dataset and an overall histogram to assist the decision of choosing thresholds for the filter function.

```
pdf("gla_report_maf_TM_r2.pdf", height=20, width=20)
gl.report.maf(gla)
dev.off()
```

Filter loci by maf

```
pdf("gla_filter_maf_TM_r1.pdf")
glb <- gl.filter.maf(gla, threshold = 0.03)
dev.off()
```

*#Details*

glb

Report Call Rates/ Missing Data - loci

SNP datasets generated by DArT have missing values primarily arising from failure to call a SNP because of a mutation at one or both of the the restriction enzyme recognition sites. This script reports the number of missing values for each of several percentiles. The script `gl.filter.callrate()` will filter out the loci with call rates below a specified threshold.

```
pdf("glb_report_callrate_loc_TM_r1.pdf")
gl.report.callrate(glb, method='loc')
dev.off()
```

Report Call Rates/ Missing Data - individuals

The `gl.report.callrate` function outputs a table which conveniently shows the number of samples that are retained/excluded for a given threshold. This helps in deciding on a threshold for filtering the dataset.

```
pdf("glb_report_callrate_ind_TM_r1.pdf")
gl.report.callrate(glb, method='ind')
dev.off()
```

Calculate call rate for each locus

```
pdf("glb_filter_callrate_loc_TM_r1.pdf")
glc <- gl.filter.callrate(glb, method="loc", threshold=0.8)
```

```
dev.off()
```

```
#Details
```

```
glc
```

Calculate call rate for each individual

```
pdf("glb_filter_callrate_ind_TM_r1.pdf")  
gld <- gl.filter.callrate(glc, method="ind", threshold=0.8)  
dev.off()
```

```
#Details
```

```
gld
```

Hamming distance - Linkage disequilibrium

```
pdf("gle_Hamming_distance_TM_r1.pdf")  
gle <- gl.filter.hamming(gld, threshold=0.2)  
dev.off()
```

```
#Details
```

```
gle
```

```
save(gle, file="gle_TM_r1.rdata")
```

Filter Hardy-Weinberg-Equilibrium Filters departure of Hardy-Weinberg-Equilibrium for every loci per population or overall

```
glg <- gl.filter.hwe(gle)
```

```
#Details
```

```
glg
```

Compare smear plot between original dataset and filtered dataset

```
pdf("gl_original_dataset_TM_r1.pdf")  
plot(gla)  
dev.off()
```

```
pdf("gl_filtered_dataset_TM_r1.pdf")  
plot(glg)  
dev.off()
```
